# Supplementary material
Source: PubMed Central journal article supplement (PMC4281929)
Supplement: NIHMS650948-supplement-Supplementary_data.pdf [file NIHMS650948-supplement-Supplementary_data.pdf]

**Supplementary Table 1.** Correlations among TCE metabolites in serum and liver in TCE-treated mice in a sub-acute study (600 mg/kg/d for 5 days).

|               |        | TCA in serum | DCA in serum | DCVG in serum | DCVC in serum | TCA in liver | DCA in liver | TCOH in liver | DCVG in liver |
|---------------|--------|--------------|--------------|---------------|---------------|--------------|--------------|---------------|---------------|
| DCVG in liver | $\rho$ | -0.49        | 0.54         | 0.77          | 0.67          | -0.10        | 0.09         | 0.40          | 1             |
|               | $q$    | -            | -            | -             | <b>0.017</b>  | -            | -            | -             |               |
|               | n      | 21           | 17           | 6             | 19            | 26           | 26           | 25            | 26            |
| TCOH in liver | $\rho$ | -0.28        | 0.13         | -0.1          | 0.26          | -0.28        | -0.12        | 1             |               |
|               | $q$    | -            | -            | -             | -             | -            | -            |               |               |
|               | n      | 20           | 16           | 5             | 18            | 25           | 25           | 25            |               |
| DCA in liver  | $\rho$ | 0.78         | 0.19         | 0.37          | 0.00          | 0.74         | 1            |               |               |
|               | $q$    | <b>0.001</b> | -            | -             | -             | <b>0.001</b> |              |               |               |
|               | n      | 21           | 17           | 6             | 19            | 26           | 26           |               |               |
| TCA in liver  | $\rho$ | 0.62         | -0.24        | -0.2          | -0.09         | 1            |              |               |               |
|               | $q$    | <b>0.020</b> | -            | -             | -             |              |              |               |               |
|               | n      | 21           | 17           | 6             | 19            | 26           |              |               |               |
| DCVC in serum | $\rho$ | -0.48        | 0.03         | 0.54          | 1             |              |              |               |               |
|               | $q$    | -            | -            | -             |               |              |              |               |               |
|               | n      | 19           | 15           | 7             | 20            |              |              |               |               |
| DCVG in serum | $\rho$ | -0.29        | -0.31        | 1             |               |              |              |               |               |
|               | $q$    | -            | -            |               |               |              |              |               |               |
|               | n      | 7            | 6            | 7             |               |              |              |               |               |
| DCA in serum  | $\rho$ | -0.11        | 1            |               |               |              |              |               |               |
|               | $q$    | -            |              |               |               |              |              |               |               |
|               | n      | 18           | 18           |               |               |              |              |               |               |
| TCA in serum  | $\rho$ | 1            |              |               |               |              |              |               |               |
|               | $q$    |              |              |               |               |              |              |               |               |
|               | n      | 22           |              |               |               |              |              |               |               |

Table displays Spearman rank correlation ( $\rho$ ), false discovery rate-corrected significance value ( $q$ ), and the number of data points with matching values in the same animal (n). Empty cell indicates that no correlation value was computed. Dash (-) indicates that the correlation was not significant ( $q>0.1$ ).

**Supplementary Table 2.** Correlations among TCE metabolites and toxicity phenotypes in the liver of TCE-treated mice in a sub-acute study (600 mg/kg/d for 5 days). Data from vehicle-treated samples were not included in the analyses.

|                              |        | TCA              | DCA              | TCOH  | DCVG  | Liver/Body weight ratio | <i>Acox1</i> | <i>Cyp4a10</i> | Hepato-cellular proliferation |
|------------------------------|--------|------------------|------------------|-------|-------|-------------------------|--------------|----------------|-------------------------------|
| Hepatocellular proliferation | $\rho$ | 0.22             | 0.30             | -0.43 | -0.39 | 0.16                    | 0.23         | 0.27           | 1                             |
|                              | $q$    | -                | -                | -     | -     | -                       | -            | -              |                               |
|                              | n      | 23               | 23               | 22    | 23    | 24                      | 20           | 20             | 24                            |
| <i>Cyp4a10</i>               | $\rho$ | 0.63             | 0.79             | -0.13 | 0.00  | 0.35                    | 0.68         | 1              |                               |
|                              | $q$    | <b>0.022</b>     | <b>&lt;0.001</b> | -     | -     | -                       | <b>0.006</b> |                |                               |
|                              | n      | 19               | 19               | 18    | 19    | 20                      | 20           | 20             |                               |
| <i>Acox1</i>                 | $\rho$ | 0.60             | 0.89             | -0.15 | 0.11  | 0.09                    | 1            |                |                               |
|                              | $q$    | <b>0.031</b>     | <b>&lt;0.001</b> | -     | -     | -                       |              |                |                               |
|                              | n      | 19               | 19               | 18    | 19    | 20                      | 20           |                |                               |
| Liver/Body weight ratio      | $\rho$ | -0.03            | 0.15             | -0.42 | -0.38 | 1                       |              |                |                               |
|                              | $q$    | -                | -                | -     | -     |                         |              |                |                               |
|                              | n      | 26               | 26               | 25    | 26    | 27                      |              |                |                               |
| DCVG                         | $\rho$ | -0.10            | 0.09             | 0.40  | 1     |                         |              |                |                               |
|                              | $q$    | -                | -                | -     |       |                         |              |                |                               |
|                              | n      | 26               | 26               | 25    | 26    |                         |              |                |                               |
| TCOH                         | $\rho$ | -0.28            | -0.12            | 1     |       |                         |              |                |                               |
|                              | $q$    | -                | -                |       |       |                         |              |                |                               |
|                              | n      | 25               | 25               | 25    |       |                         |              |                |                               |
| DCA                          | $\rho$ | 0.74             | 1                |       |       |                         |              |                |                               |
|                              | $q$    | <b>&lt;0.001</b> |                  |       |       |                         |              |                |                               |
|                              | n      | 26               | 26               |       |       |                         |              |                |                               |
| TCA                          | $\rho$ | 1                |                  |       |       |                         |              |                |                               |
|                              | $q$    |                  |                  |       |       |                         |              |                |                               |
|                              | n      | 26               |                  |       |       |                         |              |                |                               |

Table displays Spearman rank correlation ( $\rho$ ), false discovery rate-corrected significance value ( $q$ ), and the number of data points with matching values in the same animal (n). Empty cell indicates that no correlation value was computed. Dash (-) indicates that the correlation was not significant ( $q>0.1$ ).

**Supplementary Table 3.** Correlations among TCE metabolites in serum and liver in TCE-treated mice in a sub-chronic study (100 or 400 mg/kg/d for 1, 2 or 4 wks).

|               |        | TCA in serum     | DCA in serum     | TCA in liver     | DCA in liver     | TCOH in liver | DCVG in liver |
|---------------|--------|------------------|------------------|------------------|------------------|---------------|---------------|
| DCVG in liver | $\rho$ | 0.04             | -0.09            | 0.20             | -0.13            | 0.41          | 1             |
|               | $q$    | -                | -                | -                | -                | -             |               |
|               | n      | 15               | 15               | 16               | 16               | 16            | 16            |
| TCOH in liver | $\rho$ | 0.65             | 0.72             | 0.60             | 0.65             | 1             |               |
|               | $q$    | <b>&lt;0.001</b> | <b>&lt;0.001</b> | <b>&lt;0.001</b> | <b>&lt;0.001</b> |               |               |
|               | n      | 36               | 36               | 37               | 37               | 37            |               |
| DCA in liver  | $\rho$ | 0.83             | 0.97             | 0.90             | 1                |               |               |
|               | $q$    | <b>&lt;0.001</b> | <b>&lt;0.001</b> | <b>&lt;0.001</b> |                  |               |               |
|               | n      | 40               | 42               | 43               | 43               |               |               |
| TCA in liver  | $\rho$ | 0.90             | 0.91             | 1                |                  |               |               |
|               | $q$    | <b>&lt;0.001</b> | <b>&lt;0.001</b> |                  |                  |               |               |
|               | n      | 40               | 42               | 43               |                  |               |               |
| DCA in serum  | $\rho$ | 0.87             | 1                |                  |                  |               |               |
|               | $q$    | <b>&lt;0.001</b> |                  |                  |                  |               |               |
|               | n      | 39               | 42               |                  |                  |               |               |
| TCA in serum  | $\rho$ | 1                |                  |                  |                  |               |               |
|               | $q$    |                  |                  |                  |                  |               |               |
|               | n      | 40               |                  |                  |                  |               |               |

Table displays Spearman rank correlation ( $\rho$ ), false discovery rate-corrected significance value ( $q$ ), and the number of data points with matching values in the same animal (n). Empty cell indicates that no correlation value was computed. Dash (-) indicates that the correlation was not significant ( $q > 0.1$ ).

**Supplementary Table 4.** Correlations among TCE metabolites and toxicity phenotypes in the liver of TCE-treated mice in a sub-chronic study (100 or 400 mg/kg/d for 1, 2 or 4 wks). Data from vehicle-treated samples were not included in the analyses.

|                              |        | TCA              | DCA              | TCOH         | DCVG  | Liver/Body weight ratio | <i>Acox1</i> | <i>Cyp4a10</i> | Hepato-cellular proliferation |
|------------------------------|--------|------------------|------------------|--------------|-------|-------------------------|--------------|----------------|-------------------------------|
| Hepatocellular proliferation | $\rho$ | 0.13             | 0.09             | -0.09        | -0.24 | -0.25                   | -0.26        | -0.43          | 1                             |
|                              | $q$    | -                | -                | -            | -     | -                       | -            | <b>0.0515</b>  |                               |
|                              | n      | 35               | 35               | 32           | 14    | 34                      | 28           | 28             | 35                            |
| <i>Cyp4a10</i>               | $\rho$ | 0.65             | 0.58             | 0.36         | 0.50  | 0.68                    | 0.39         | 1              |                               |
|                              | $q$    | <b>&lt;0.001</b> | <b>0.001</b>     | <b>0.089</b> | -     | <b>&lt;0.001</b>        | <b>0.045</b> |                |                               |
|                              | n      | 35               | 35               | 31           | 12    | 34                      | 35           | 35             |                               |
| <i>Acox1</i>                 | $\rho$ | 0.44             | 0.45             | 0.48         | 0.11  | 0.34                    | 1            |                |                               |
|                              | $q$    | <b>0.022</b>     | <b>0.020</b>     | <b>0.020</b> | -     | <b>0.092</b>            |              |                |                               |
|                              | n      | 35               | 35               | 31           | 12    | 34                      | 35           |                |                               |
| Liver/Body weight ratio      | $\rho$ | 0.47             | 0.43             | 0.34         | 0.16  | 1                       |              |                |                               |
|                              | $q$    | <b>0.007</b>     | <b>0.017</b>     | <b>0.083</b> | -     |                         |              |                |                               |
|                              | n      | 41               | 41               | 36           | 16    | 41                      |              |                |                               |
| DCVG                         | $\rho$ | 0.20             | -0.13            | 0.41         | 1     |                         |              |                |                               |
|                              | $q$    | -                | -                | -            |       |                         |              |                |                               |
|                              | n      | 16               | 16               | 16           | 16    |                         |              |                |                               |
| TCOH                         | $\rho$ | 0.60             | 0.65             | 1            |       |                         |              |                |                               |
|                              | $q$    | <b>&lt;0.001</b> | <b>&lt;0.001</b> |              |       |                         |              |                |                               |
|                              | n      | 37               | 37               | 37           |       |                         |              |                |                               |
| DCA                          | $\rho$ | 0.90             | 1                |              |       |                         |              |                |                               |
|                              | $q$    | <b>&lt;0.001</b> |                  |              |       |                         |              |                |                               |
|                              | n      | 43               | 43               |              |       |                         |              |                |                               |
| TCA                          | $\rho$ | 1                |                  |              |       |                         |              |                |                               |
|                              | $q$    |                  |                  |              |       |                         |              |                |                               |
|                              | n      | 43               |                  |              |       |                         |              |                |                               |

Table displays Spearman rank correlation ( $\rho$ ), false discovery rate-corrected significance value ( $q$ ), and the number of data points with matching values in the same animal (n). Empty cell indicates that no correlation value was computed. Dash (-) indicates that the correlation was not significant ( $q>0.1$ ).

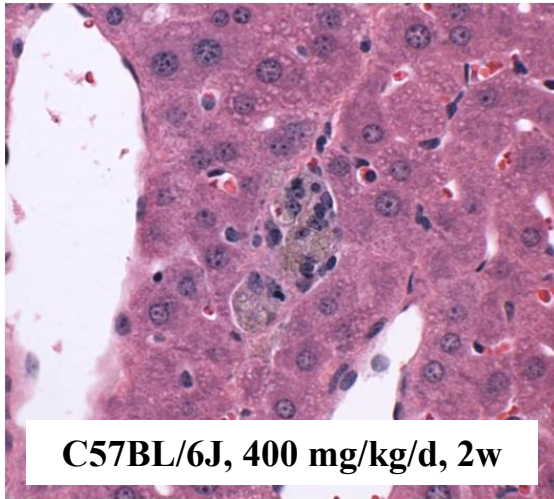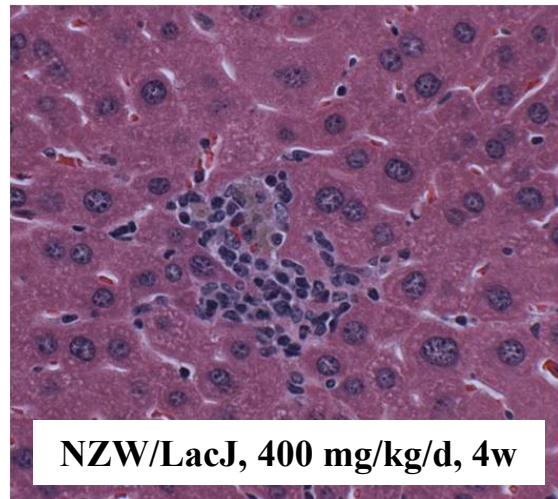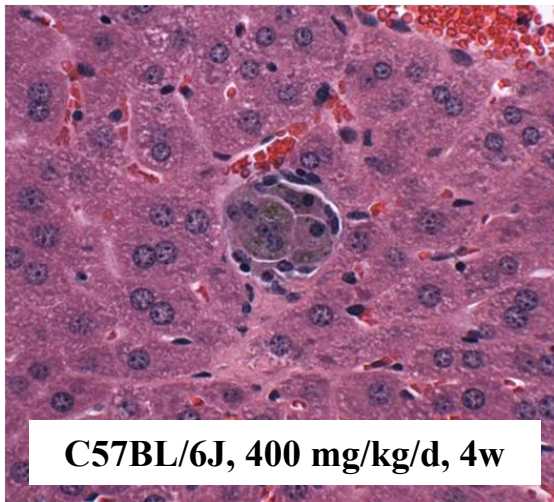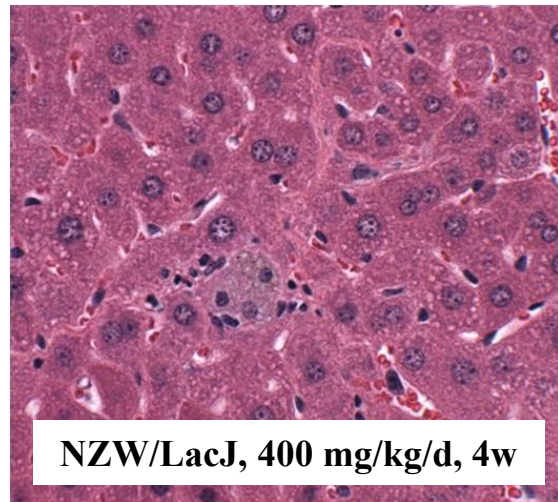

**Supplementary Figure 1.** Hemosiderin depositions observed in liver from TCE-treated group. Deposition of yellowish-brown pigments was a result of phagocytized red blood cells in macrophages in liver.
